# Supplementary material for: Surface etching of HKUST-1 promoted via supramolecular interactions for chromatography
Source: Royal Society of Chemistry journal article supplement (doi:10.1039/c4ta02568g), 2014-01-01
Supplement: c4ta02568g1.pdf [file c4ta02568g1.pdf]

## **Supporting information for**

### Surface etching of HKUST-1 promoted via supramolecular interactions for chromatography

Samir El-Hankari, Jia Huo, Adam Ahmed, Haifei Zhang and Darren Bradshaw\*

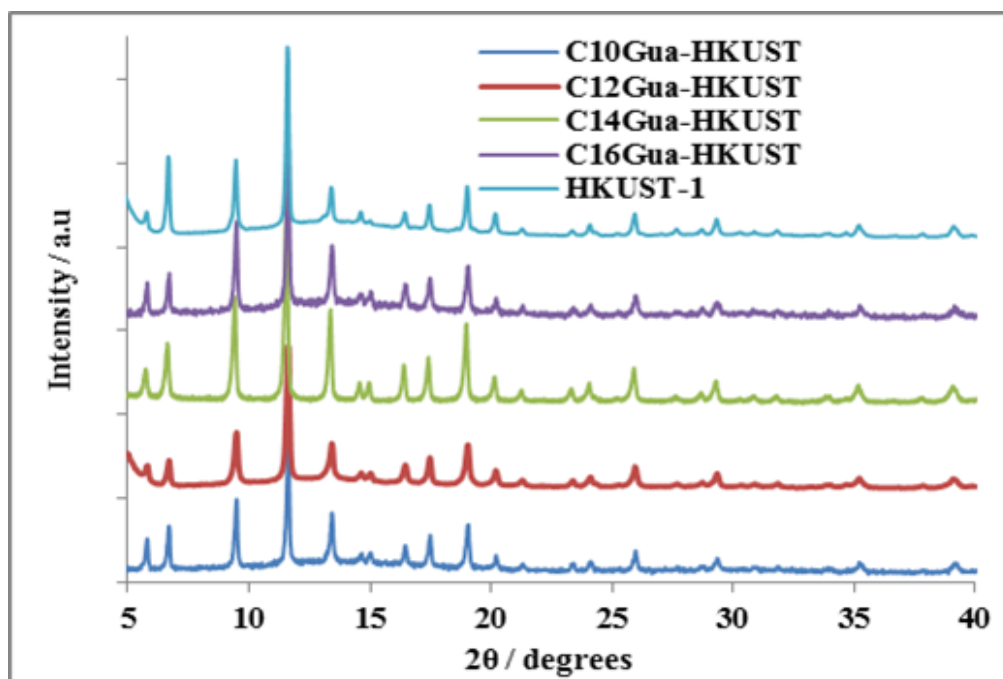

**Figure S1.** PXRD data of  $C_n$ Gua-HKUST-1 materials prepared in the presence of  $C_n$ Gua surfactants compared to a pure bulk sample of HKUST-1

| Material             | Micropore uptake <sup>a</sup> / $\text{cm}^3\text{g}^{-1}$ | $S_{\text{BET}} / \text{m}^2\text{g}^{-1}$ | Average pore diameter <sup>b</sup> / nm |
|----------------------|------------------------------------------------------------|--------------------------------------------|-----------------------------------------|
| $C_{10}$ Gua-HKUST-1 | 195                                                        | 739                                        | 56                                      |
| $C_{12}$ Gua-HKUST-1 | 167                                                        | 653                                        | 73                                      |
| $C_{14}$ Gua-HKUST-1 | 149                                                        | 581                                        | 53                                      |
| $C_{16}$ Gua-HKUST-1 | 127                                                        | 489                                        | 68                                      |
| HKUST-1              | 271                                                        | 1069                                       | -                                       |

<sup>a</sup> Determined at  $p/p^0 = 0.3$ ; <sup>b</sup> Estimated at the maximum of the BJH pore size distribution.

**Table S1.** Porosity data and surface properties of the  $C_n$ Gua-HKUST-1 phases determined from the  $N_2$  adsorption isotherms shown in manuscript figure 2.

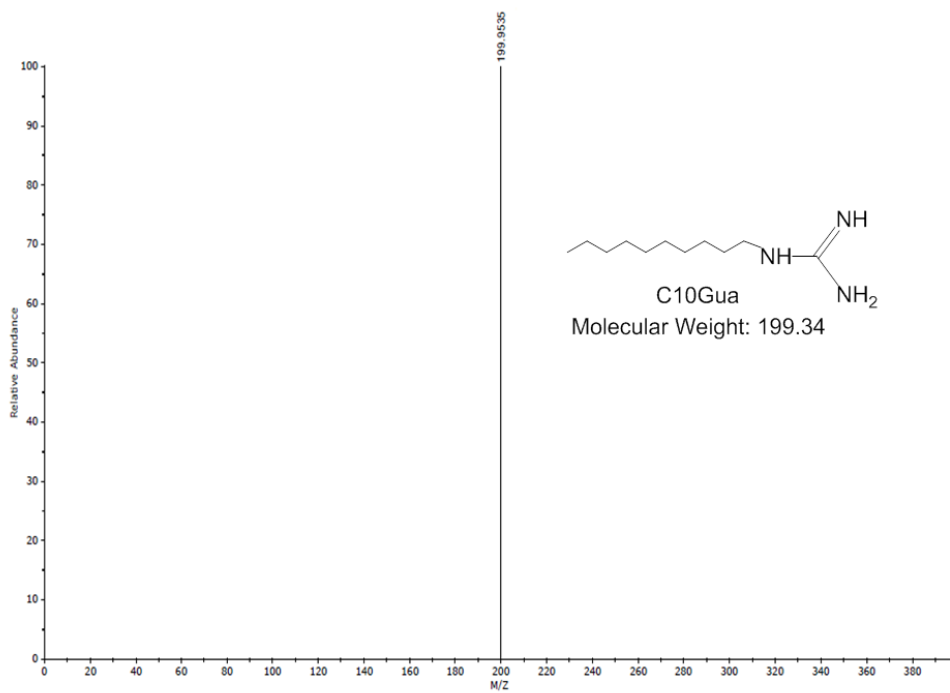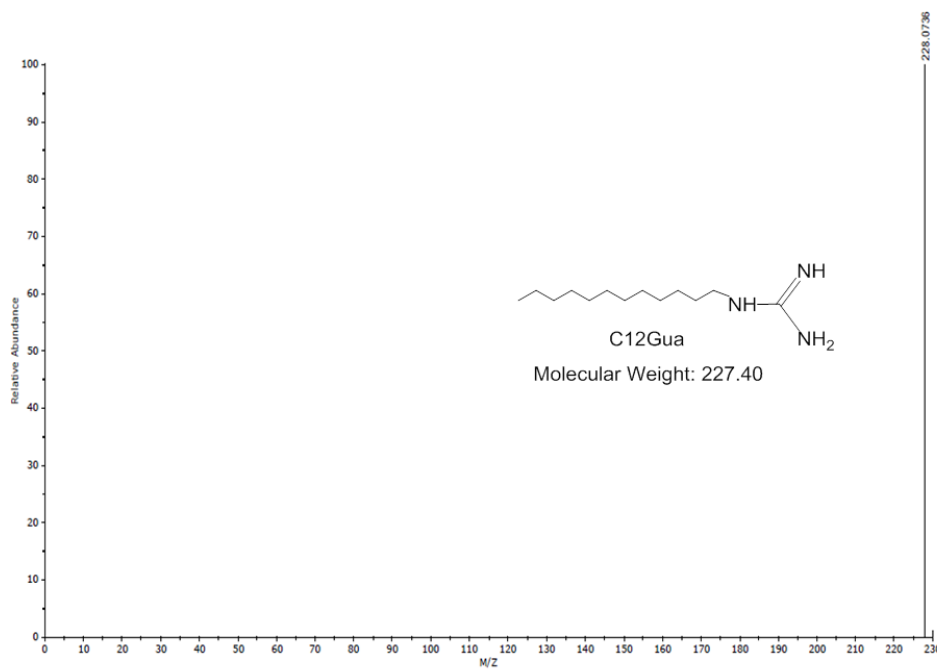

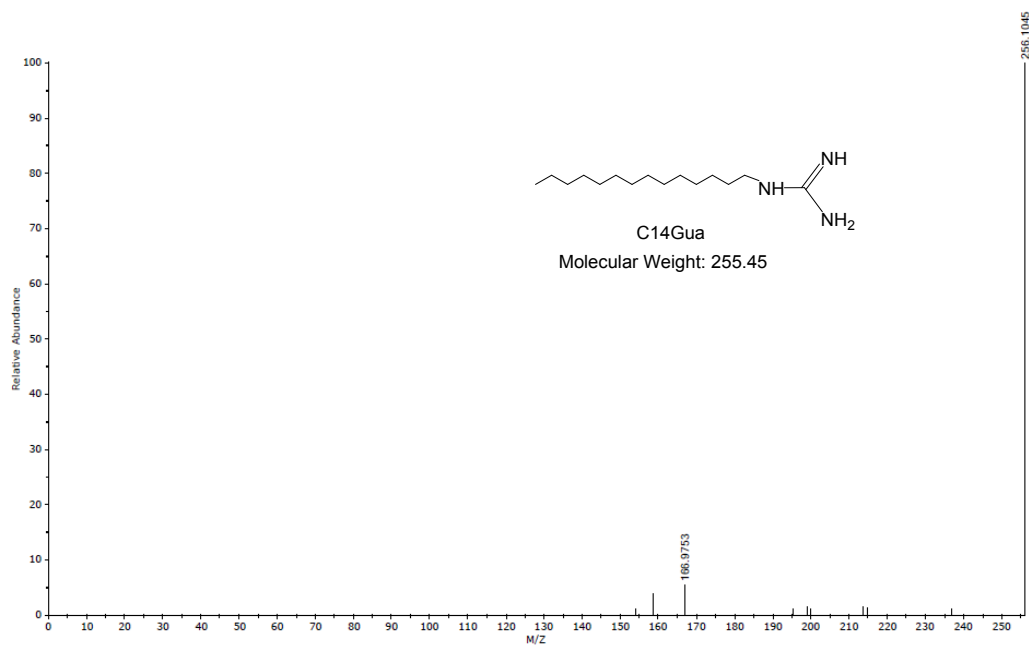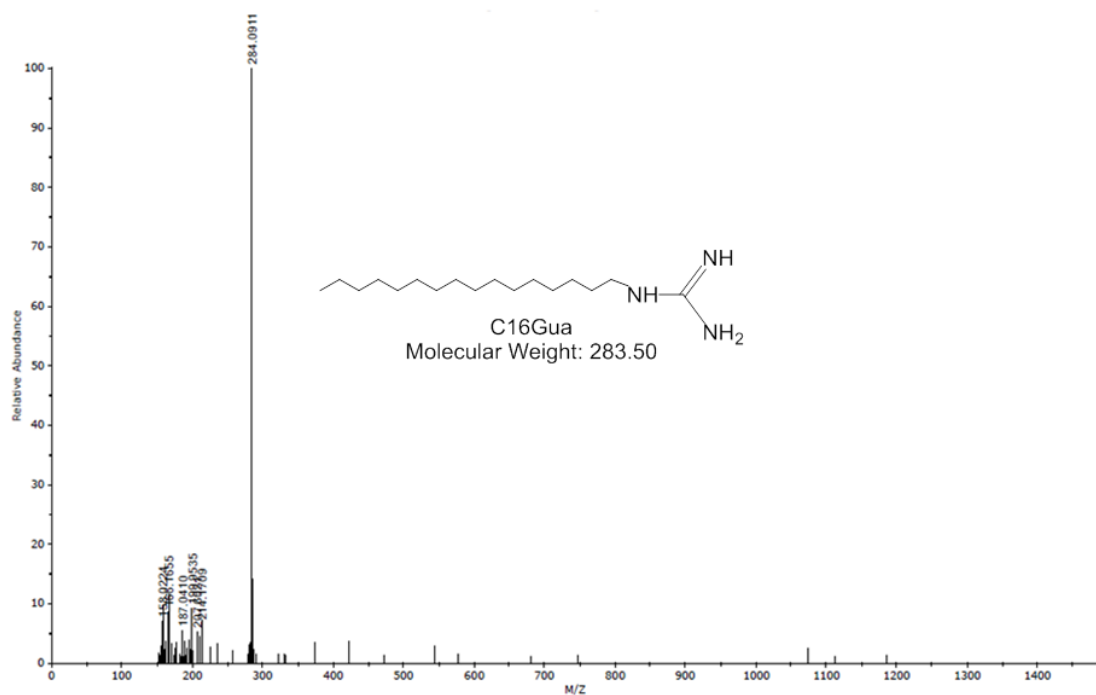

**Figure S2.** ES-MS data of C<sub>n</sub>Gua-HKUST-1 following acid digestion and filtration, which clearly identifies the presence of residual C<sub>n</sub>Gua species in all cases.

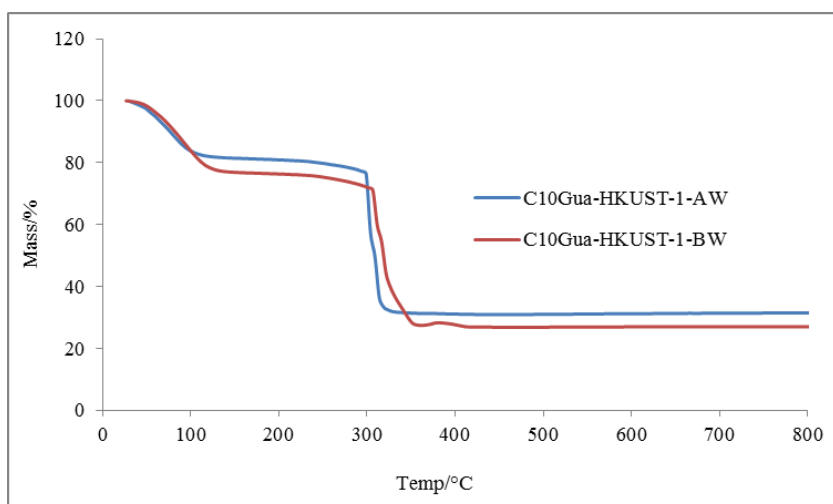

**Figure S3.** TGA profiles for  $C_{10}$ Gua-HKUST-1 directly following synthesis (red) and after washing (blue) with EtOH at 60 °C. After washing the mass loss corresponding to organics (ligand + residual  $C_n$ Gua, normalized to the guest-free formula of  $Cu_3BTC_2$ ) decreases slightly indicating that some surfactant has been removed. The residual CuO at 800 °C indicates that purity has increased from 95.8 to 99% HKUST-1 following the washing procedure. The relative ease of removal strongly suggests that  $C_n$ Gua is largely restricted to the crystal surface.

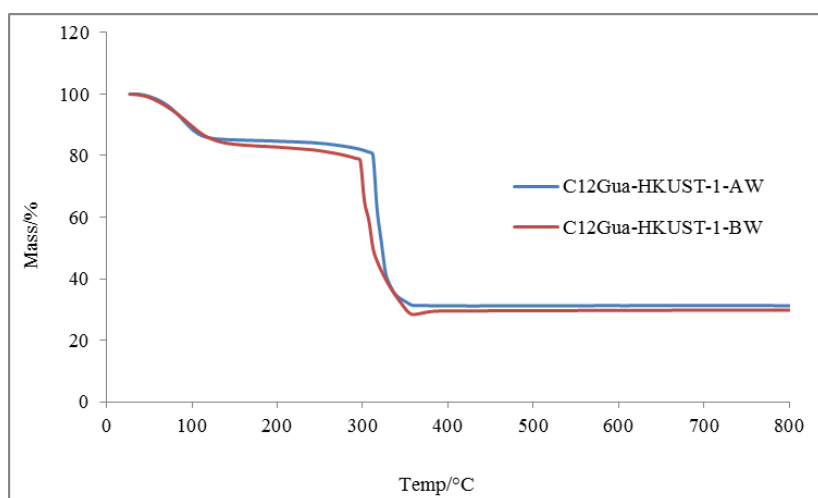

**Figure S4.** TGA profiles for  $C_{12}$ Gua-HKUST-1 directly following synthesis (red) and after washing (blue) with EtOH at 60 °C. After washing the mass loss corresponding to organics (ligand + residual  $C_n$ Gua, normalized to the guest-free formula of  $Cu_3BTC_2$ ) decreases slightly indicating that some surfactant has been removed. The residual CuO at 800 °C indicates that purity has increased from 95.7 to 98.7% HKUST-1 following the washing procedure.

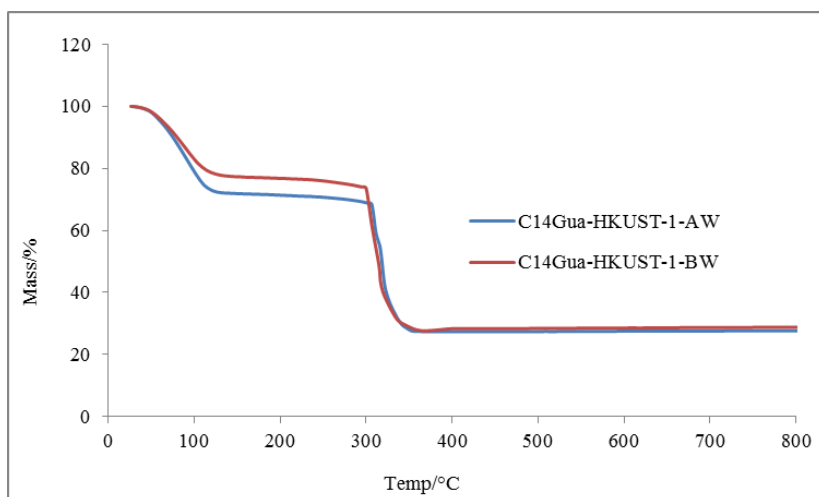

**Figure S5.** TGA profiles for  $C_{14}$ Gua-HKUST-1 directly following synthesis (red) and after washing (blue) with EtOH at 60 °C. In this case the residual CuO at 800 °C is identical both before and after washing, indicating that purity is > 99% HKUST-1. Minor variations between the surfactant systems arise due to slightly differing solubilities of the  $C_n$ Gua species.

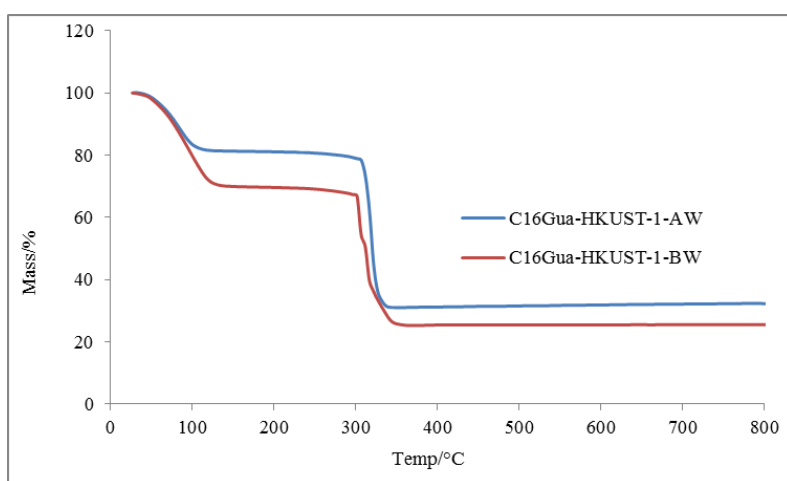

**Figure S6.** TGA profiles for  $C_{16}$ Gua-HKUST-1 directly following synthesis (red) and after washing (blue) with EtOH at 60 °C. After washing the mass loss corresponding to organics (ligand + residual  $C_n$ Gua normalized to the guest-free formula of  $Cu_3BTC_2$ ) decreases slightly indicating that some surfactant has been removed. The residual CuO at 800 °C indicates that purity has increased from 95.7 to 98.9 % HKUST-1 following the washing procedure.

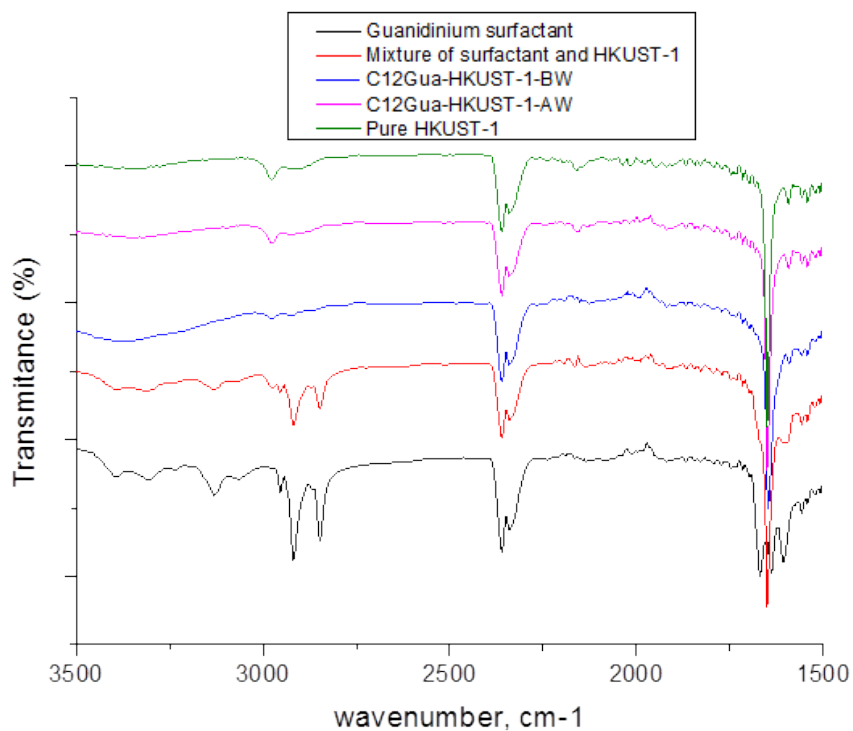

**Figure S7.** FTIR data of  $C_{12}$ Gua-HKUST-1 phases before/after washing (blue and cyan, respectively) compared to pure  $C_{12}$ Gua (black), HKUST-1 (green) and a physical mixture of HKUST-1 and 20 wt%  $C_{12}$ Gua (red).  $C_{12}$ Gua is not visible in the as-made or washed  $C_{12}$ Gua-HKUST-1 phases, further confirming the very low residual amount found by TGA.

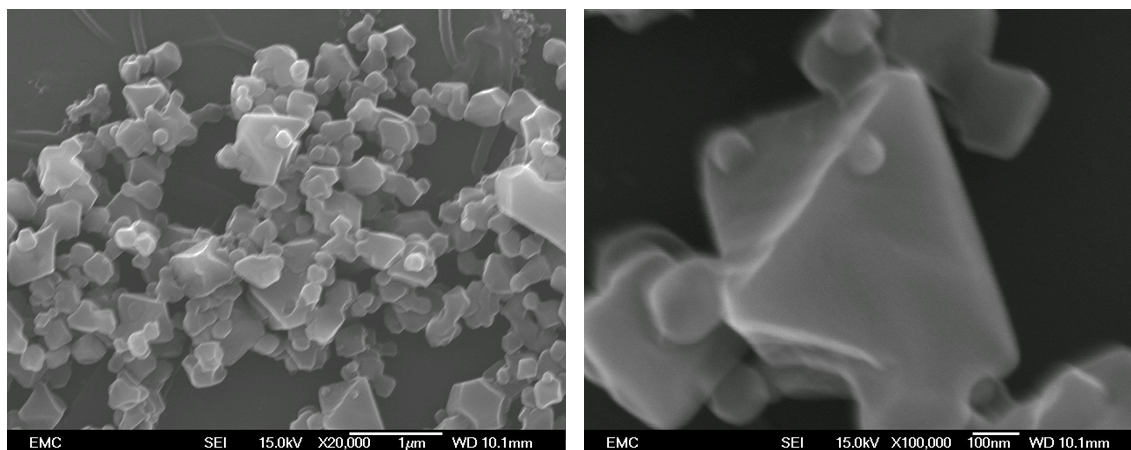

**Figure S8.** SEM images of  $C_{12}$ Gua-HKUST-1 as representative for  $C_n$ Gua-HKUST-1 phases immediately following synthesis, which clearly show smooth featureless crystal surfaces.

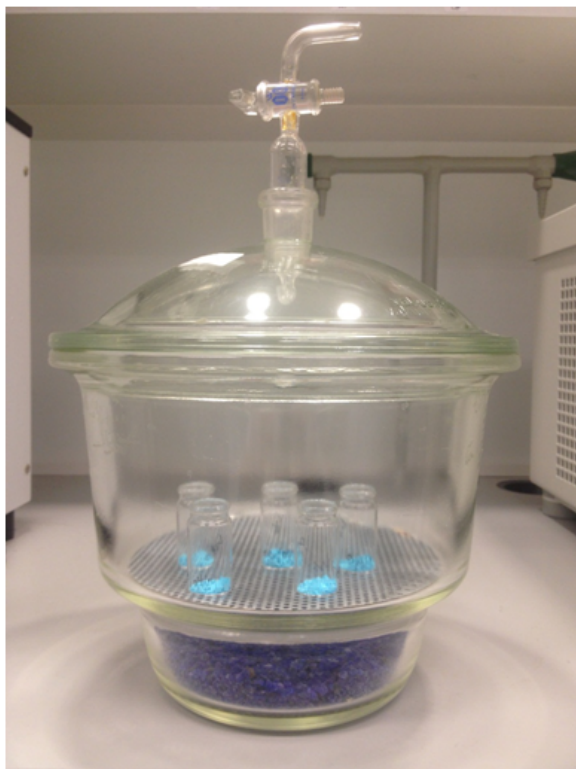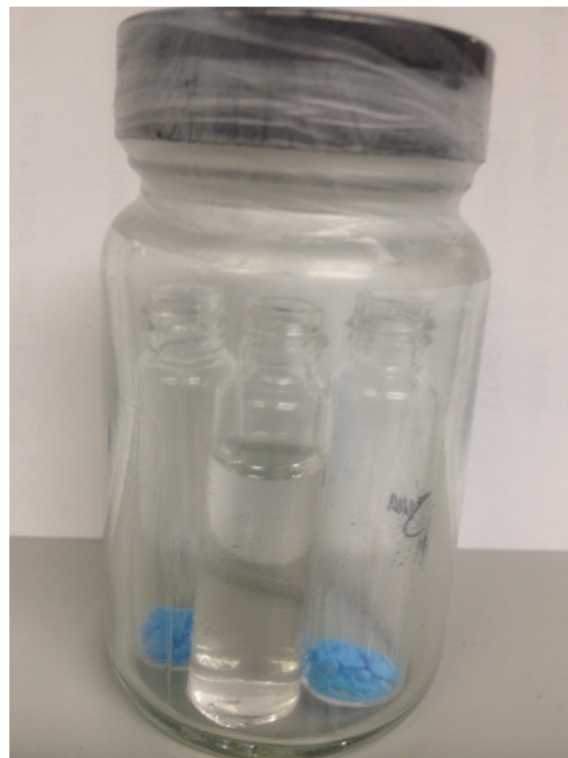

**Figure S9.** Experimental set-up to control the moisture exposure to  $C_n$ Gua-HKUST-1 phases when investigating the role of water in the etching process. (Left) samples were placed in a desiccator to provide a low humidity environment relative to the laboratory atmosphere and (right) a sealed vessel containing  $C_n$ Gua-HKUST-1 and an open vial of water to increase humidity levels.



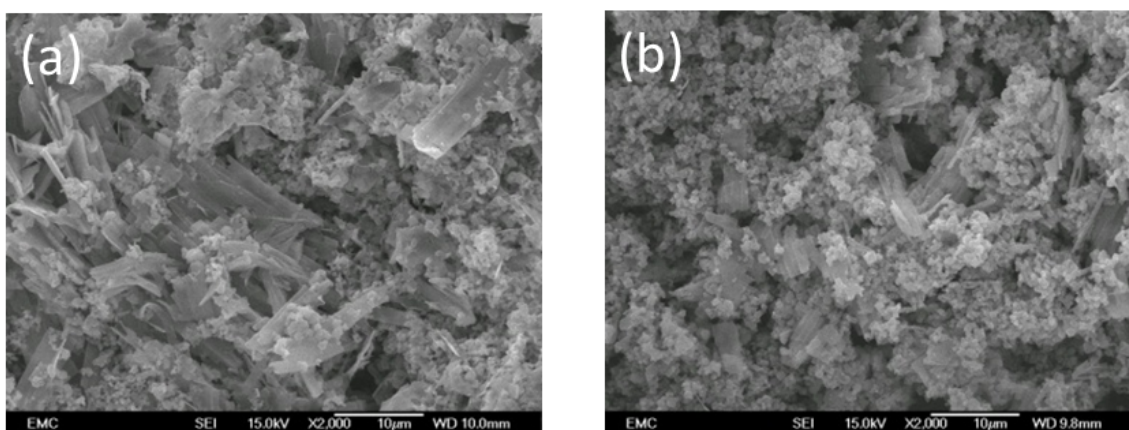

**Figure S10.** SEM images of (a) C<sub>12</sub>Gua-HKUST-1 and (b) C<sub>14</sub>Gua-HKUST-1 following exposure to a moisture rich environment.

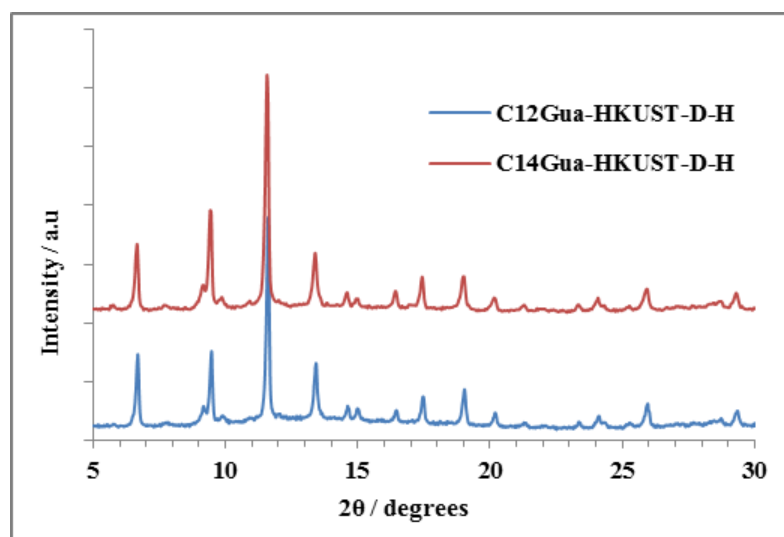

**Figure S11.** PXRD patterns of C<sub>12</sub>Gua-HKUST-1 and C<sub>14</sub>Gua-HKUST-1 following exposure to a moisture rich environment. The appearance of additional peaks and broadening of existing ones is consistent with the deterioration of the material under these conditions as highlighted in figure S9.

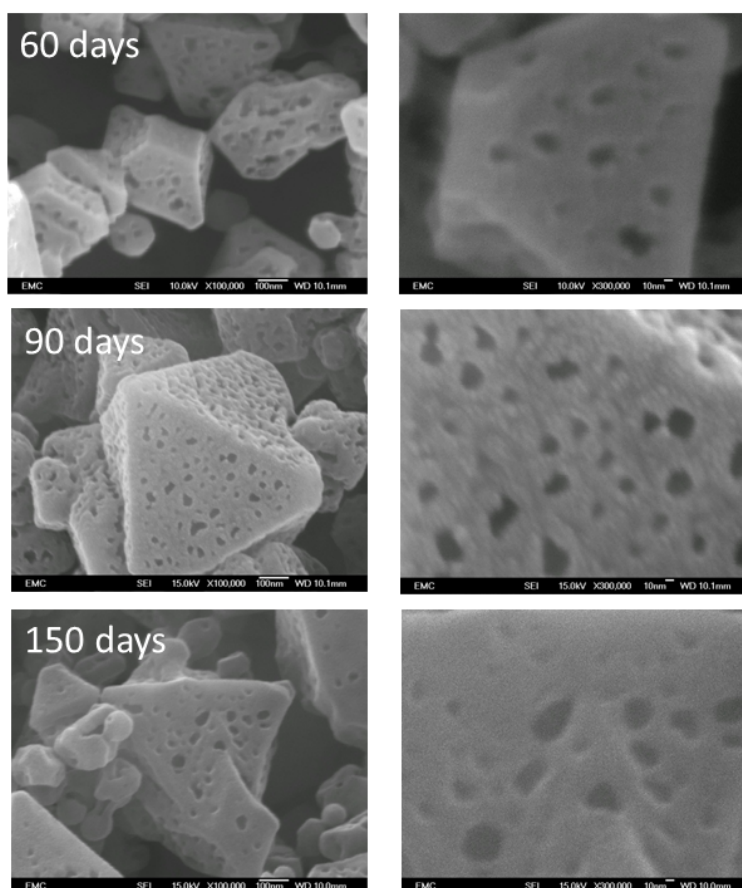

**Figure S12.** SEM images of C<sub>14</sub>Gua-HKUST-1 following storage in a desiccator for various periods of time. Scale bars are 100 nm (left images) and 10 nm (right images).

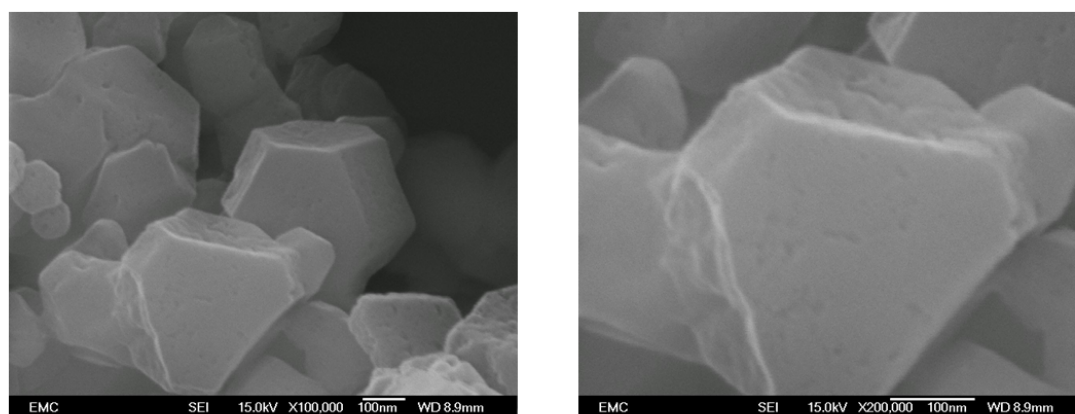

**Figure S13.** HKUST-1 following storage in a desiccator for 150 days.

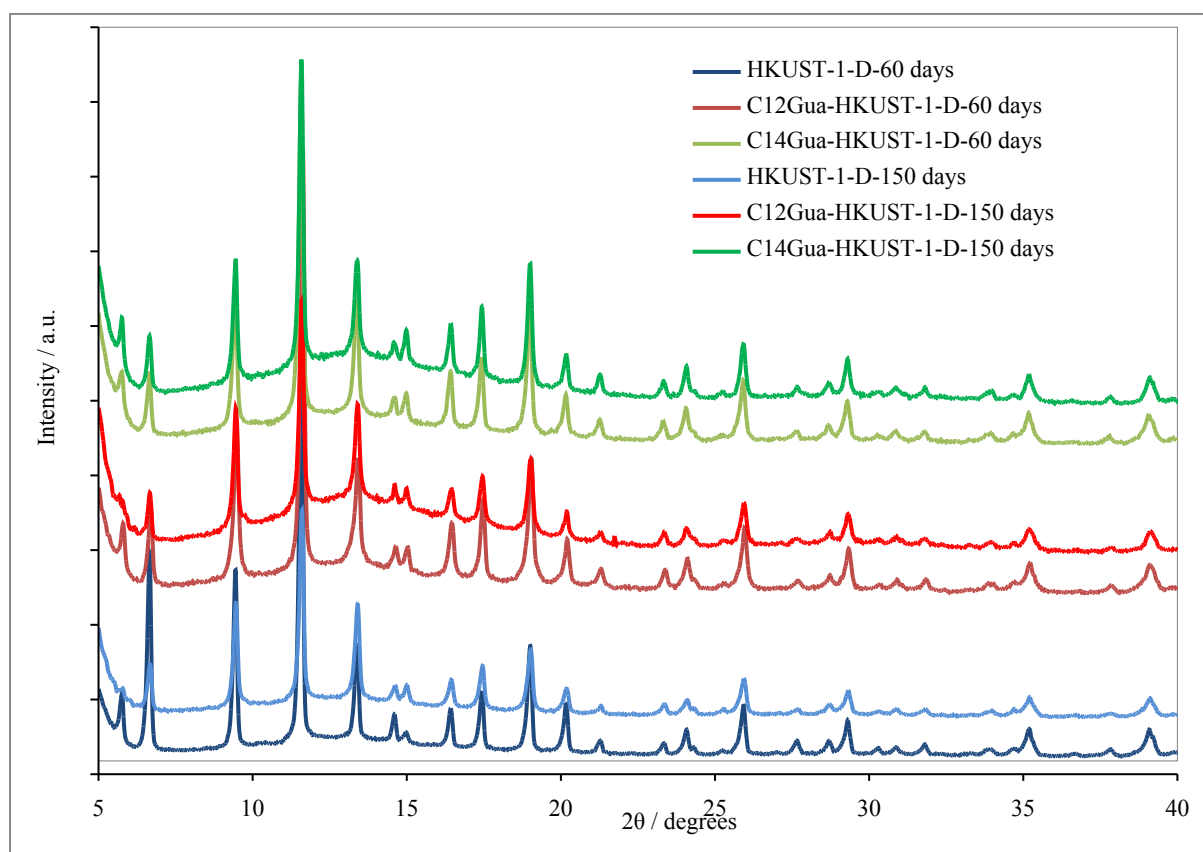

**Figure S14.** PXRD data of C<sub>n</sub>Gua-HKUST-1 (n = 12, 14) and pure bulk HKUST-1 following storage in a desiccator for periods of up to 150 days clearly indicating that the framework structure is intact.

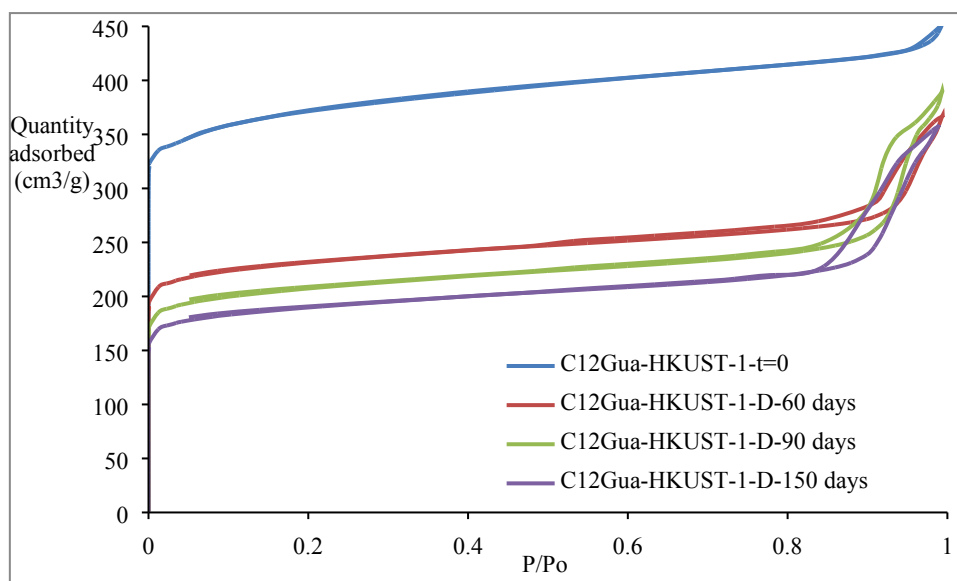

**Figure S15.**  $N_2$  adsorption-desorption isotherms at 77K of  $C_{12}Gua-HKUST-1$  following storage under low humidity conditions in a desiccator for various periods of time. The blue type I isotherm is for  $C_{12}Gua-HKUST-1$  immediately following synthesis ( $t = 0$ ), and corresponds to the smooth-faceted crystals shown in figure S8. It is clear that microporosity is reduced with increasing storage time, as also shown in table S2.

| Material and storage time                    | Micropore uptake <sup>a</sup> / $cm^3g^{-1}$ | $S_{BET} / m^2g^{-1}$ | Average (meso)pore diameter <sup>b</sup> / nm |
|----------------------------------------------|----------------------------------------------|-----------------------|-----------------------------------------------|
| $C_{12}Gua-HKUST-1$ (as made)                | 383                                          | 1435                  | -                                             |
| $C_{12}Gua-HKUST-1$ (60 days)                | 238                                          | 897                   | 29                                            |
| $C_{12}Gua-HKUST-1$ (90 days)                | 214                                          | 802                   | 22                                            |
| $C_{12}Gua-HKUST-1$ (150 days)               | 196                                          | 736                   | 17                                            |
| $C_{12}Gua-HKUST-1$ (60 days, then exposure) | 201                                          | 774                   | 33                                            |
| $C_{12}Gua-HKUST-1^c$                        | 167                                          | 653                   | 73                                            |

<sup>a</sup> Determined at  $p/p^0 = 0.3$ ; <sup>b</sup> Estimated at the maximum of the BJH pore size distribution; <sup>c</sup> This sample was stored on the bench from the outset and corresponds to the  $C_{12}Gua-HKUST-1$  entry in table S1.

**Table S2.** Porosity data and surface properties of  $C_{12}Gua-HKUST-1$  phases following desiccator storage determined from the  $N_2$  adsorption isotherms shown in figure S13.

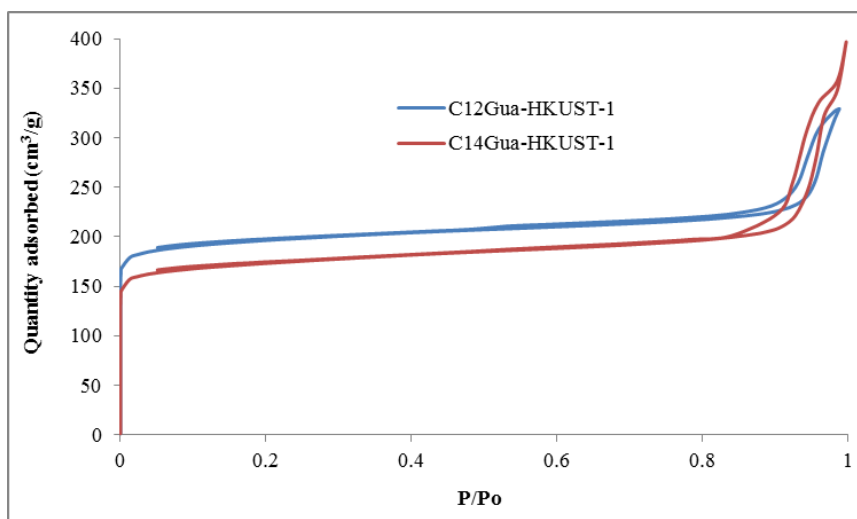

**Figure S16.** N<sub>2</sub> adsorption-desorption isotherms at 77K of C<sub>12</sub>Gua-HKUST-1 and C<sub>14</sub>Gua-HKUST-1 phases following exposure to the laboratory atmosphere after storing in a desiccator for two months.

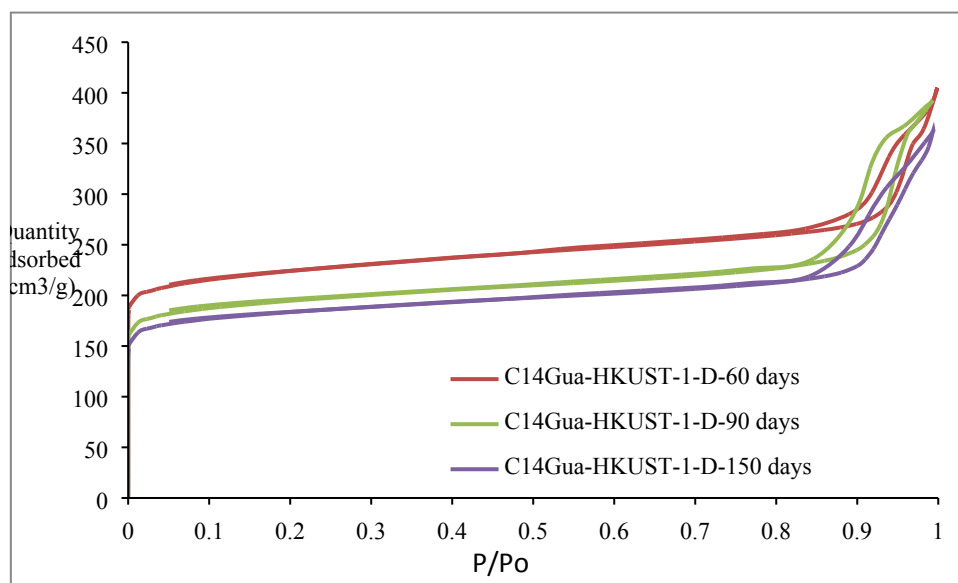

**Figure S17.** N<sub>2</sub> adsorption-desorption isotherms at 77K of C<sub>14</sub>Gua-HKUST-1 following storage under low humidity conditions in a desiccator for various periods of time.

| Material and storage time                            | Micropore uptake <sup>a</sup> / cm <sup>3</sup> g <sup>-1</sup> | S <sub>BET</sub> / m <sup>2</sup> g <sup>-1</sup> | Average (meso)pore diameter <sup>b</sup> / nm |
|------------------------------------------------------|-----------------------------------------------------------------|---------------------------------------------------|-----------------------------------------------|
| C <sub>14</sub> Gua-HKUST-1 (60 days)                | 232                                                             | 865                                               | 29                                            |
| C <sub>14</sub> Gua-HKUST-1 (90 days)                | 201                                                             | 753                                               | 22                                            |
| C <sub>14</sub> Gua-HKUST-1 (150 days)               | 190                                                             | 712                                               | 20                                            |
| C <sub>14</sub> Gua-HKUST-1 (60 days, then exposure) | 178                                                             | 679                                               | 32                                            |
| C <sub>14</sub> Gua-HKUST-1 <sup>c</sup>             | 149                                                             | 581                                               | 53                                            |

<sup>a</sup> Determined at  $p/p^0 = 0.3$ ; <sup>b</sup> Estimated at the maximum of the BJH pore size distribution; <sup>c</sup> This sample was stored on the bench from the outset and corresponds to the C<sub>14</sub>Gua-HKUST-1 entry in table S1.

**Table S3.** Porosity data and surface properties of C<sub>14</sub>Gua-HKUST-1 phases following desiccator storage determined from the N<sub>2</sub> adsorption isotherms shown in figure S15.

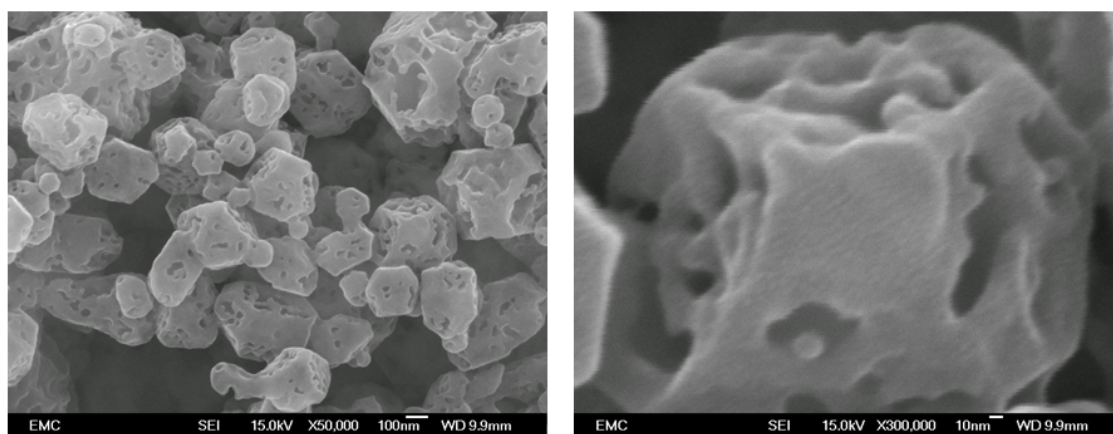

**Figure S18.** SEM images of C<sub>14</sub>Gua-HKUST-1 after 60 days storage in a desiccator followed by exposure to the laboratory atmosphere.

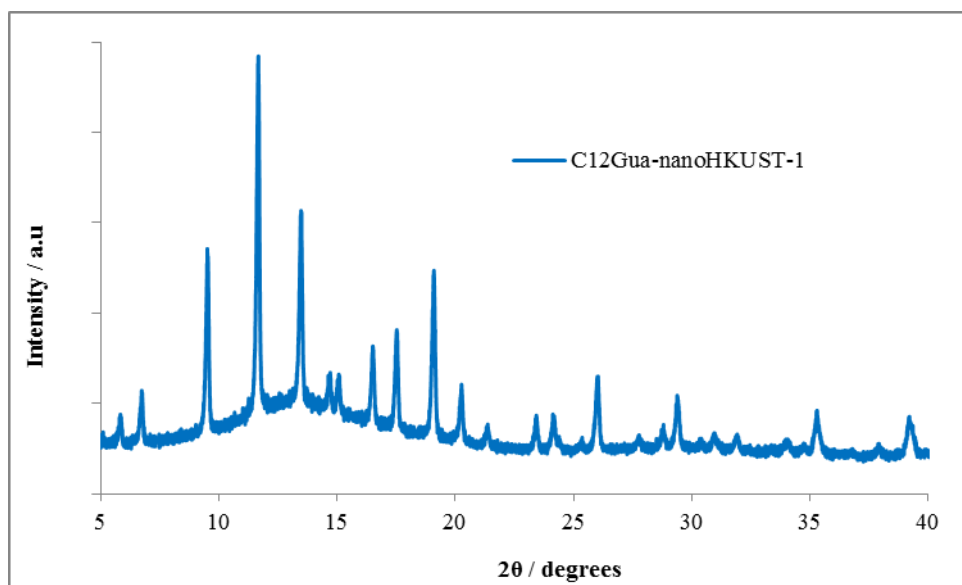

**Figure S19.** PXRD pattern of HKUST-1 nanoparticles prepared by following path b ( $C_{12}Gua + Cu(OAc)_2$ , followed by the BTC linker and solvothermal synthesis) outlined in manuscript scheme 1.

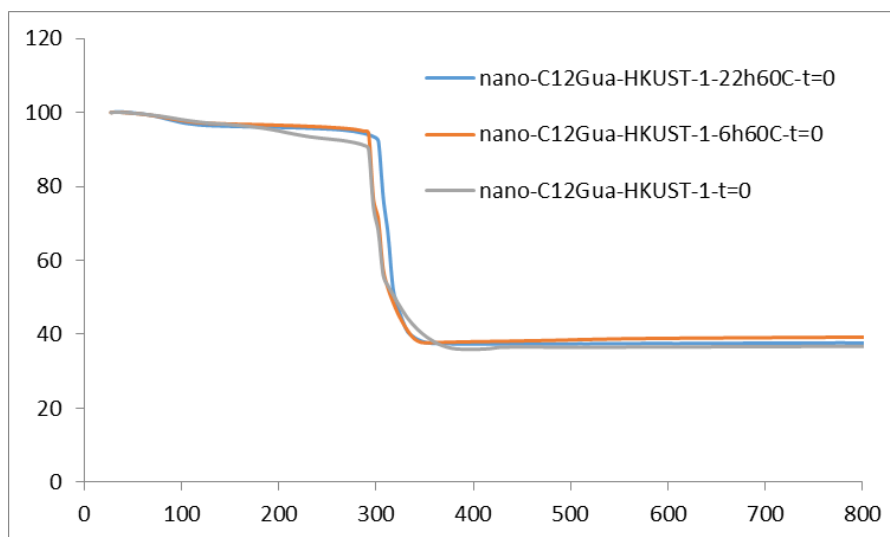

**Figure S20.** TGA data for HKUST-1 nanoparticles formed in the presence of a C<sub>12</sub>Gua surfactant before and after washing in EtOH at various time periods. The residual mass of CuO indicates that no C<sub>12</sub>Gua remains in the samples.

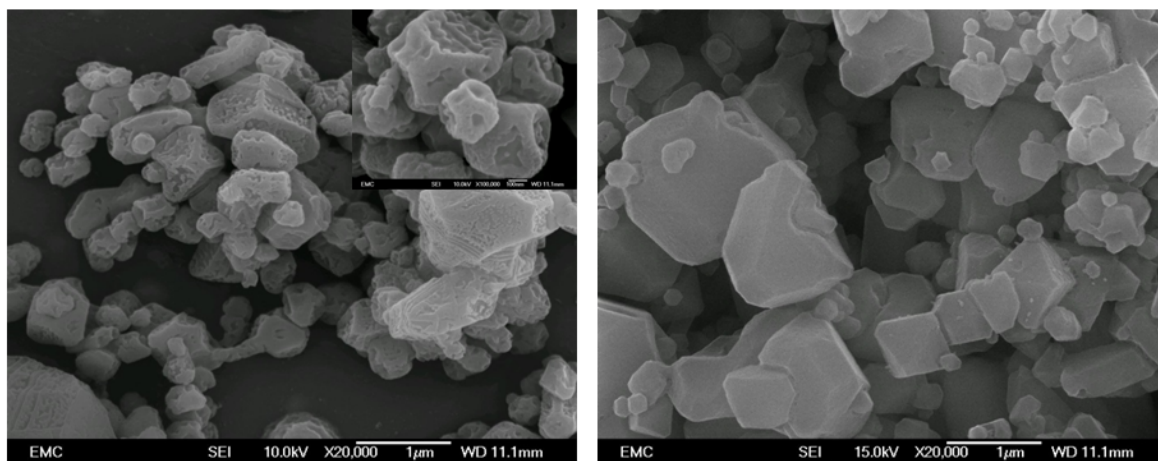

**Figure S21.** SEM images of C<sub>14</sub>Gua-HKUST-1 (left) and pure smooth-surface HKUST-1 (right) used to pack the HPLC columns, emphasizing the similarity between particle size and distribution. Scale bars are 1 µm (100 nm for inset, left).



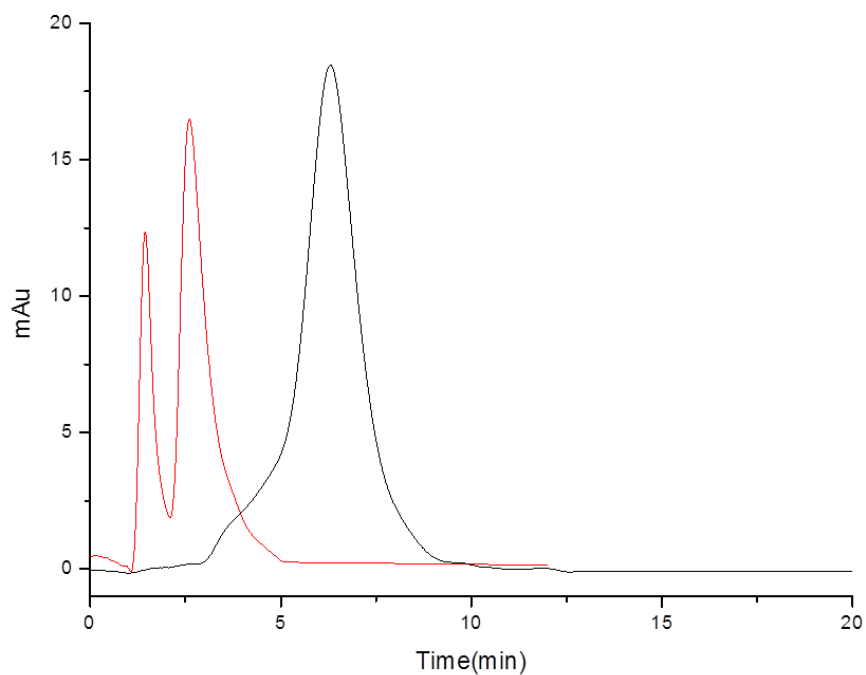

**Figure S22.** Comparison of columns packed with commercial Basolite C300 (black elution profile) and C<sub>14</sub>Gua-HKUST-1 with meso-and macroscale surface features (red elution profile) for the HPLC separation of ethylbenzene and styrene. Ethylbenzene is eluted before styrene in both cases. Conditions: injection volume 1  $\mu$ L, flow rate 1 cm<sup>3</sup> min<sup>-1</sup>, heptane:dichloromethane 98:2 v/v as the mobile phase.
